# Supplementary material for: Integration of a Technology-Based Mental Health Screening Program Into Routine Practices of Primary Health Care Services in Peru (The Allillanchu Project): Development and Implementation
Source: PubMed Central journal article supplement (PMC5893885; doi:10.2196/jmir.9208), 2018-03-15
Supplement: jmir_v20i3e100_app1.pdf [file jmir_v20i3e100_app1.pdf]

**Multimedia Appendix 1**  
**Self-Reporting Questionnaire (SRQ)**

**Instructions:**

I would like to ask you some questions about any bother or difficulty that you may have felt during the last month. Please, answer Yes or No to each one of the questions\*

| Questions                                                                                                                                                                  | Yes | No |
|----------------------------------------------------------------------------------------------------------------------------------------------------------------------------|-----|----|
| 1. Do you often have headaches?                                                                                                                                            | Yes | No |
| 2. Is your appetite poor?                                                                                                                                                  | Yes | No |
| 3. Do you sleep badly?                                                                                                                                                     | Yes | No |
| 4. Are you easily frightened?                                                                                                                                              | Yes | No |
| 5. Do your hands shake?                                                                                                                                                    | Yes | No |
| 6. Do you feel nervous, tense or worried?                                                                                                                                  | Yes | No |
| 7. Is your digestion poor?                                                                                                                                                 | Yes | No |
| 8. Do you have trouble thinking clearly?                                                                                                                                   | Yes | No |
| 9. Do you feel unhappy?                                                                                                                                                    | Yes | No |
| 10. Do you cry more than usual?                                                                                                                                            | Yes | No |
| 11. Do you find it difficult to enjoy your daily activities?                                                                                                               | Yes | No |
| 12. Do you find it difficult to make decisions?                                                                                                                            | Yes | No |
| 13. Is your daily work suffering?                                                                                                                                          | Yes | No |
| 14. Are you unable to play a useful part in life?                                                                                                                          | Yes | No |
| 15. Have you lost interest in things?                                                                                                                                      | Yes | No |
| 16. ¿Se siente aburrido/a?                                                                                                                                                 | Yes | No |
| 17. Do you feel tired all the time?                                                                                                                                        | Yes | No |
| 18. Has the thought of ending your life been on your mind?                                                                                                                 | Yes | No |
| a. Have you decided how you are going to do it?*                                                                                                                           | Yes | No |
| b. Have you decided when you are going to do it?*                                                                                                                          | Yes | No |
| 19. Do you feel someone has tried to hurt you in some way?*                                                                                                                | Yes | No |
| 20. Do you feel that you can do things that others cannot, or that you are a particularly important person?*                                                               | Yes | No |
| 21. Have you noted interferences or something weird in your thoughts?*                                                                                                     | Yes | No |
| 22. Do you hear voices without knowing where they come from or that other people cannot hear?*                                                                             | Yes | No |
| 23. Have you had shakings, attacks or falls on the floor with movement of arms and legs, biting of your tongue or loss of consciousness?*                                  | Yes | No |
| 24. Do your family, friends, doctor or priest think that you drink too much?*                                                                                              | Yes | No |
| 25. Have you wanted to quit drinking but you could not do it?*                                                                                                             | Yes | No |
| 26. Have you ever had difficulties in your work or studies because of your drinking, for example, due to drinking in your work or center of studies or for not attending?* | Yes | No |
| 27. Have you been in fights or have you been arrested while being drunk?*                                                                                                  | Yes | No |
| 28. Have you thought that you drink too much?*                                                                                                                             | Yes | No |

\*Translations made by the research team
